# Supplementary material for: Vis-to-NIR electrochromism and bright-to-dark electrofluorochromism in a triazine and thiophene-based three-dimensional covalent polymer
Source: Royal Society of Chemistry journal article supplement (doi:10.1039/d2me00119e), 2022-01-01
Supplement: d2me00119e1.pdf [file d2me00119e1.pdf]

Electronic Supplementary Information

**Vis-to-NIR electrochromism and bright-to-dark electrofluorochromism in a triazine and thiophene based three-dimensional covalent polymer**

Sayan Halder,<sup>a,#</sup> Neelam Gupta,<sup>c,#</sup> Ravi Prakash Behere<sup>c</sup>, Biplab Kumar Kuila<sup>c,\*</sup> and Chanchal Chakraborty<sup>a,b\*</sup>

<sup>a</sup>Department of Chemistry, Birla Institute of Technology & Science (BITS) Pilani, Hyderabad Campus, Samirpet, Hyderabad, Telangana 500078, India

<sup>b</sup>Materials Center for Sustainable Energy & Environment (McSEE), Birla Institute of Technology and Science, Hyderabad Campus, Hyderabad 500078, India

<sup>c</sup>Department of Chemistry, Institute of Science, Banaras Hindu University, Varanasi, Uttar Pradesh, India

\*Corresponding Author: Chanchal Chakraborty ([chanchal@hyderabad.bits-pilani.ac.in](mailto:chanchal@hyderabad.bits-pilani.ac.in))

ORCID ID: <https://orcid.org/0000-0002-4829-1367>

Biplab Kumar Kuila ([bkkuila.chem@bhu.ac.in](mailto:bkkuila.chem@bhu.ac.in))

# Sayan Halder, and Neelam Gupta contributed equally for the paper.

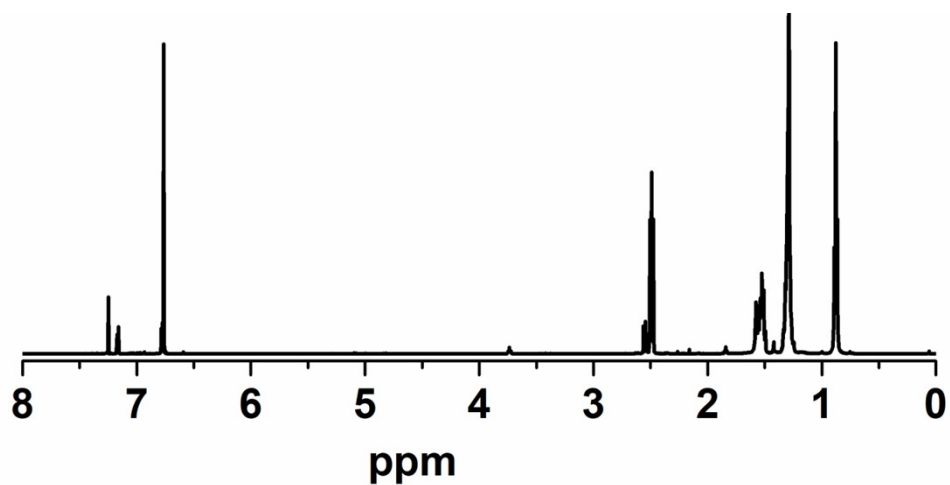

**Fig. S1.** <sup>1</sup>H NMR spectra of 2,5-dibromo-3-hexyl thiophene (7)

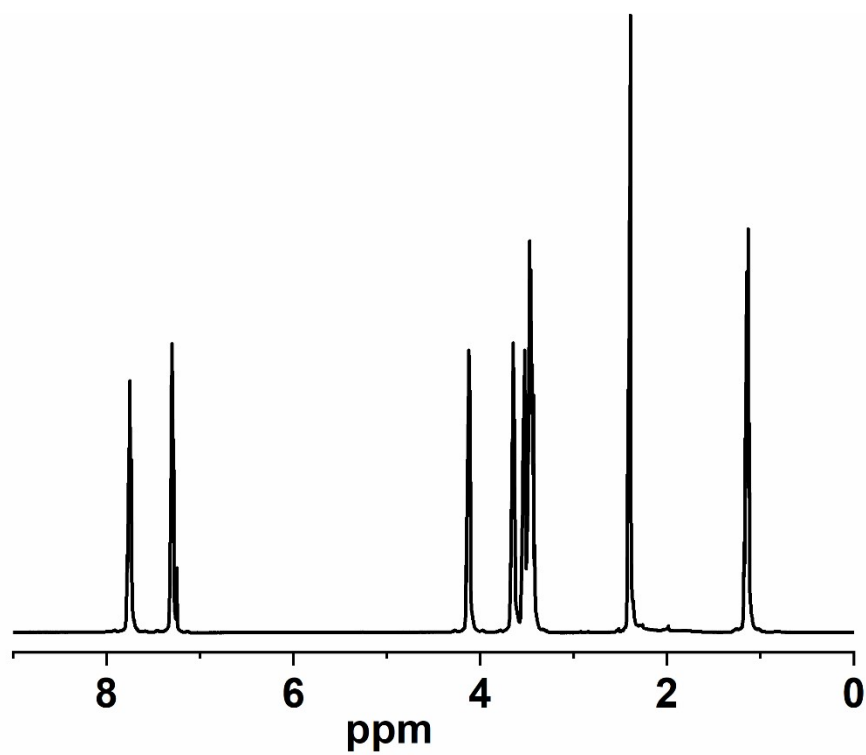

**Fig. S2.** <sup>1</sup>H NMR spectra of 2-(2-ethoxyethoxy)ethyl 4-methylbenzenesulfonate (2).

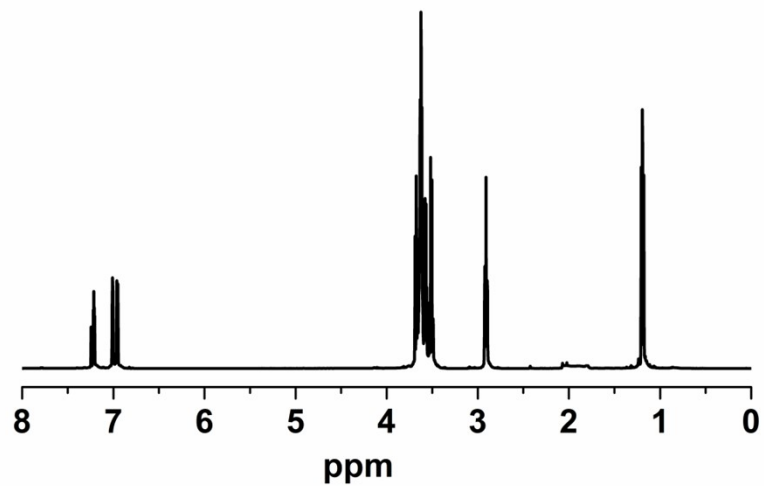

**Fig. S3.**  $^1\text{H}$  NMR spectra of 3-(2-(2-(2-ethoxyethoxy)ethoxy)ethyl)thiophene (4).

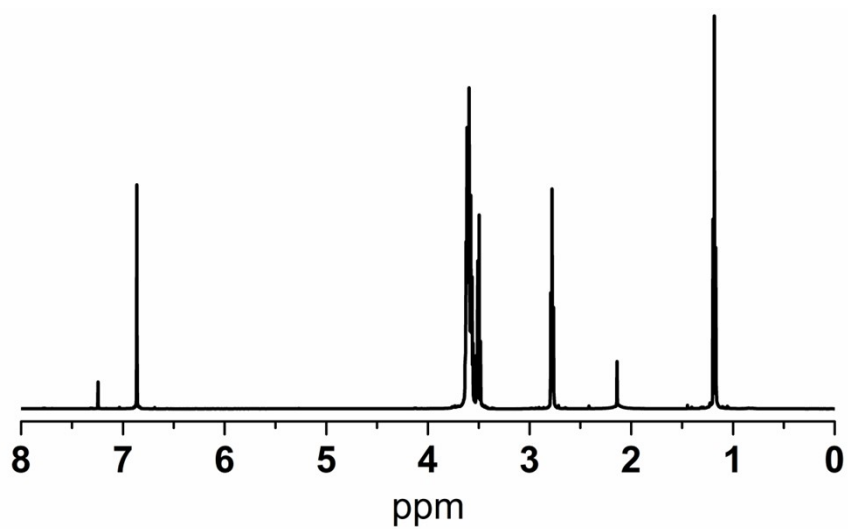

**Fig. S4.**  $^1\text{H}$  NMR spectra of 2,5-dibromo-3-(2-(2-(2-ethoxyethoxy)ethoxy)ethyl)thiophene (5).

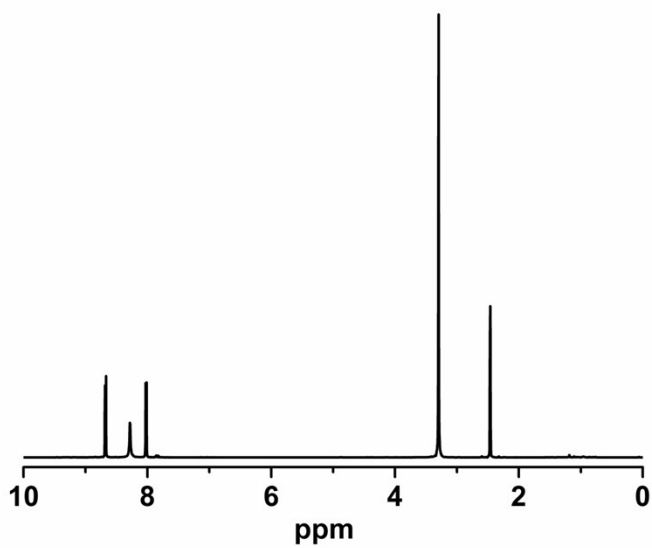

**Fig. S5.**  $^1\text{H}$  NMR spectra of((1,3,5-triazine-2,4,6-triyl)tris(benzene-4,1-diyl))triboronic acid (9)

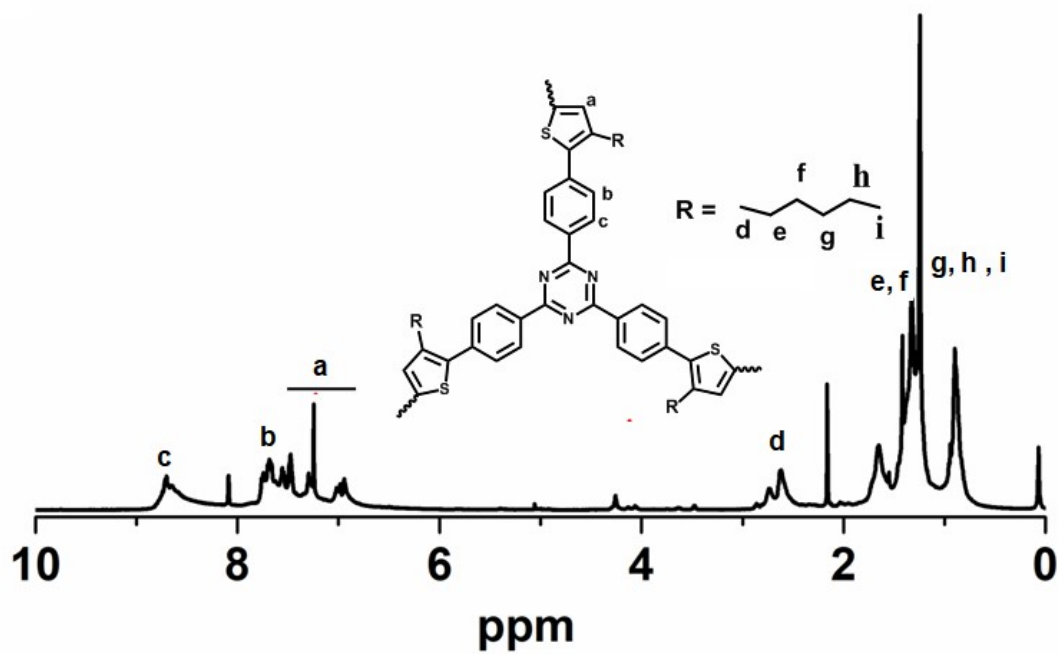

**Fig. S6.**  $^1\text{H}$  NMR spectra of polymer CPF1 with peak assigned

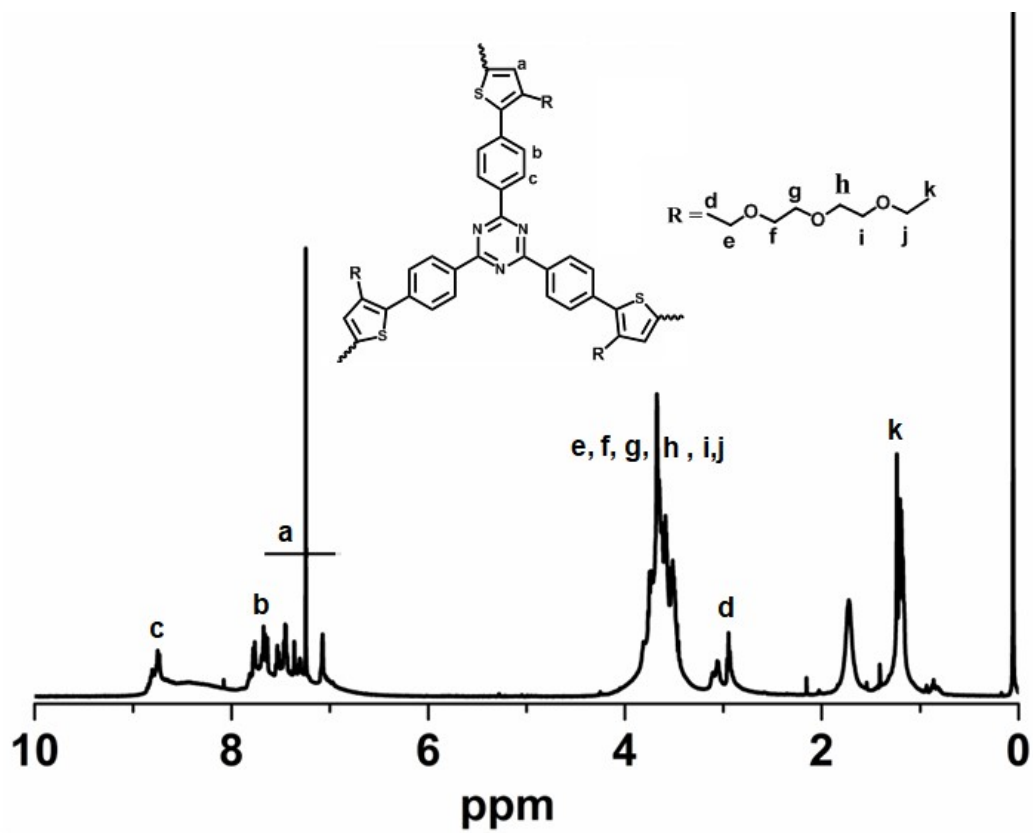

Fig. S7. <sup>1</sup>H NMR spectra of polymer CPF2 with peak assigned.

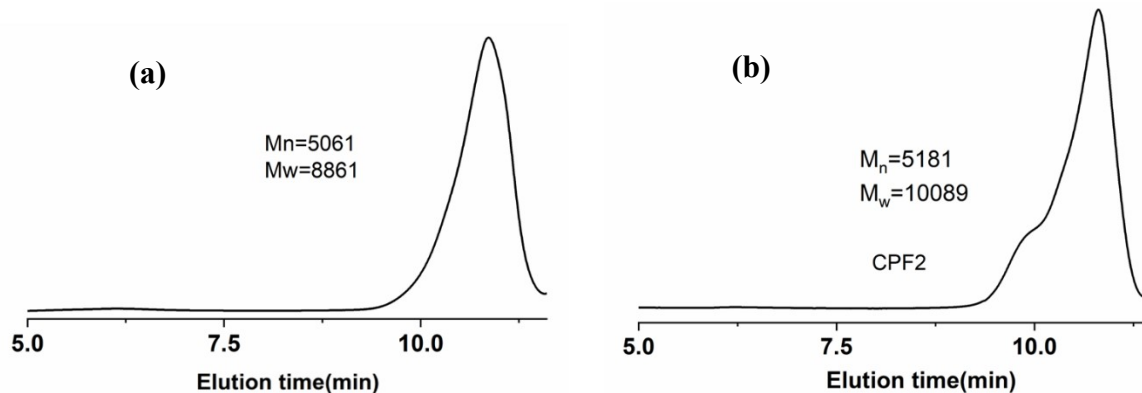

**Fig. S8.** GPC traces for the (a) CPF1 and (b) CPF2.

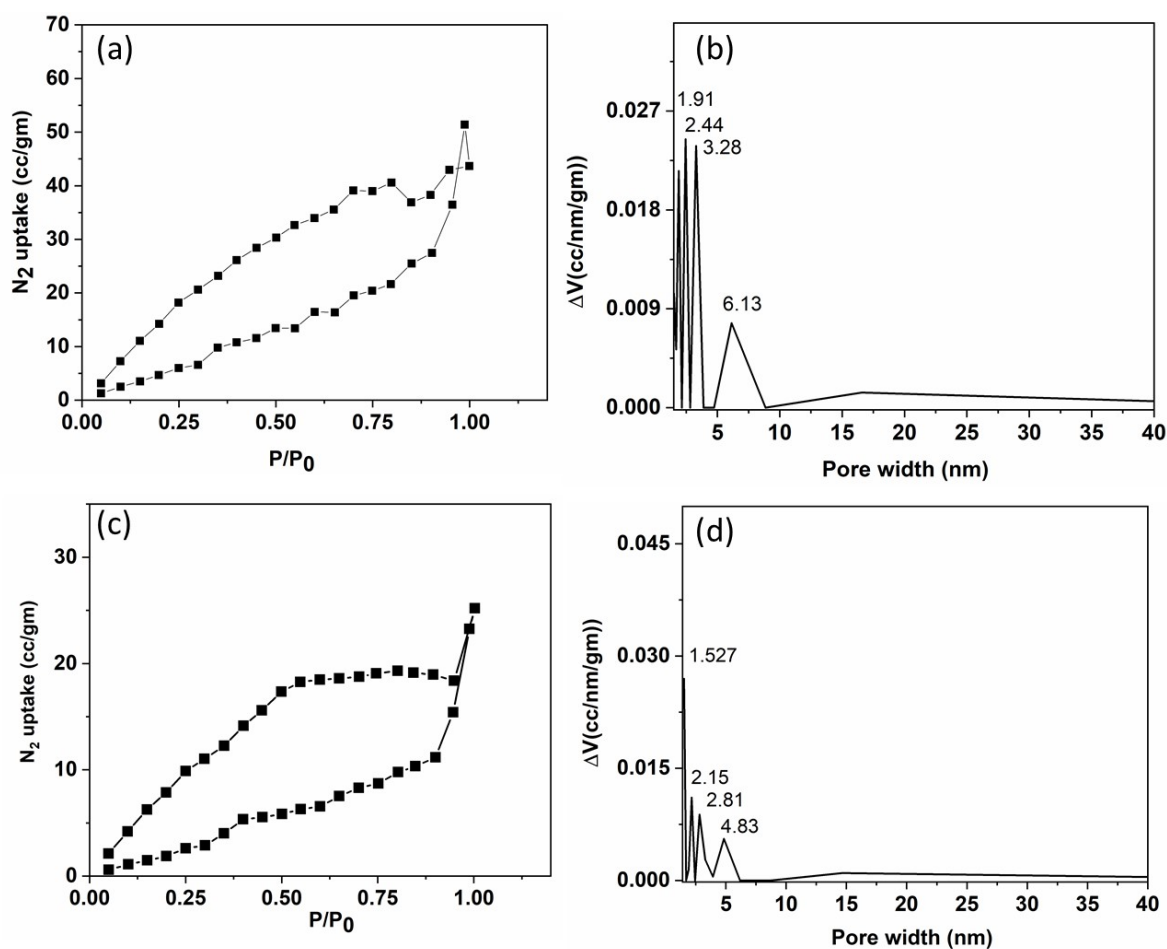

**Fig. S9.** (a) and (c) Nitrogen sorption isotherms of CPF1 and CPF2 measured at 77 K. (b) and (d) the pore size distribution of CPF1 and CPF2, respectively.

### Summary of BET Data

### CPF1

(i) BET summary

Surface Area = 34.68 m<sup>2</sup>/g

(ii) BJH adsorption summary

Surface Area = 29.49 m<sup>2</sup>/g

Pore Volume = 0.072 cc/g

Pore Radius Dv(r) = 24.467 Å

### CPF2

(i) BET summary

Surface Area = 15.54 m<sup>2</sup>/g

(ii) BJH adsorption summary

Surface Area = 16.71 m<sup>2</sup>/g

Pore Volume = 0.042 cc/g

Pore Radius Dv(r) = 15.272 Å

### Band gap study

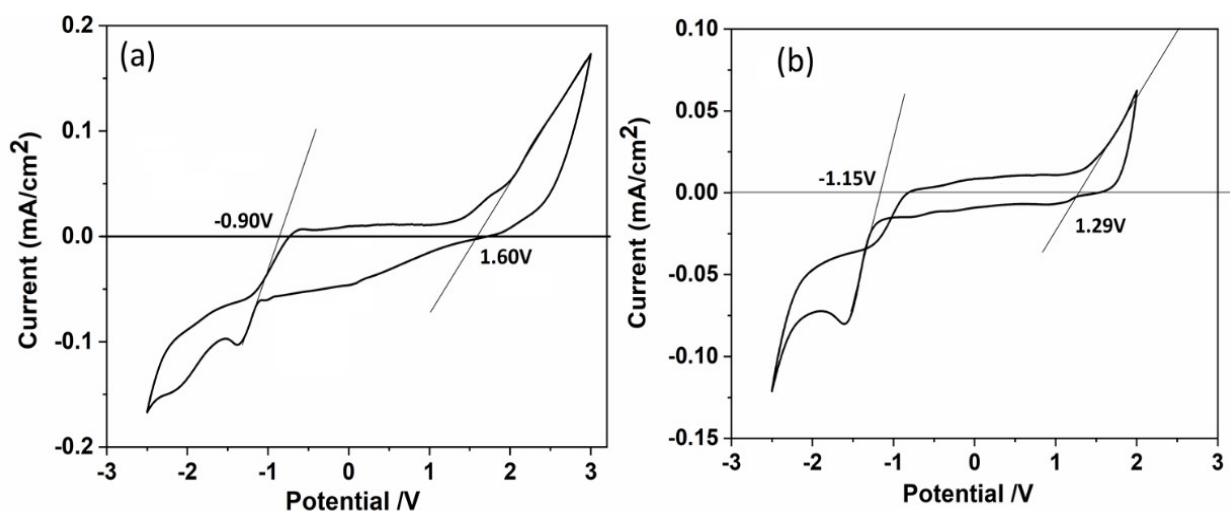

**Fig. S10.** Cyclic voltammetry of (a) CPF1 and (b) CPF 2 for the determination of HOMO, LUMO energy level and electronic band gap. CV was performed by taking the drop casted film of CPFs on glassy carbon electrode as working electrode, Pt as counter electrode and Ag/AgCl as reference electrode.

Band gap measured by following equation

$$\text{HOMO} = -e (E_{\text{ox}} + 4.4) (\text{V})$$

$$\text{LUMO} = -e (E_{\text{red}} + 4.4) (\text{V})$$

$$E_{\text{g}} = e (E_{\text{ox}} - E_{\text{red}}) (\text{V})$$

Table S1. Summary of bandgap studies of the CPFs.

| CPF  | HOMO (eV) | LUMO (eV) | $E_g$ (eV) |
|------|-----------|-----------|------------|
| CPF1 | -6.00     | -3.50     | 2.50       |
| CPF2 | -5.69     | -3.25     | 2.44       |

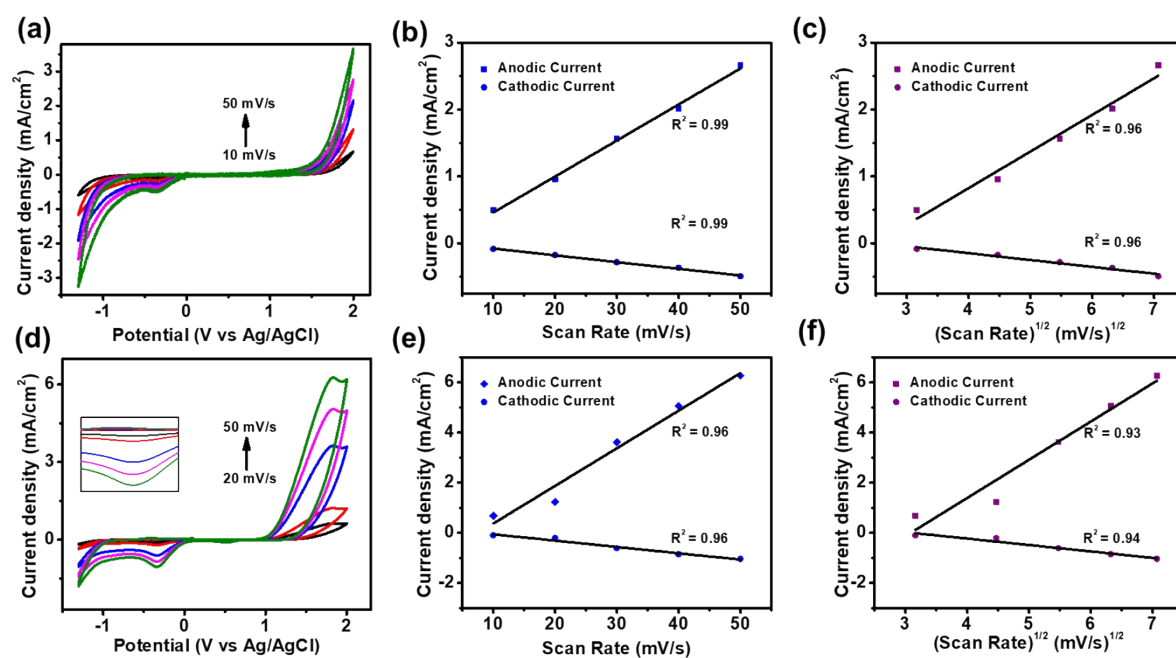

### Electrochemical characterization

**Fig. S11.** (a) CV plot in different scan rates (0.1M TBAP/ ACN vs. Ag/AgCl, satd. KCl), (b) peak current density vs. scan rate plot, and (c) peak current vs. square root of scan rate for CPF1. (d) CV plot in different scan rates (0.1M TBAP/ ACN vs. Ag/AgCl, satd. KCl), (e) peak current density vs. scan rate plot, and (f) peak current vs. square root of scan rate for CPF2.



**Table S2.** EC and EFC colour changes of previously reported EC-EFC systems.

| Derivatives                                   | EC changes           | EFC changes                | Ref.             |
|-----------------------------------------------|----------------------|----------------------------|------------------|
| Tetraphenylethene containing triphenyl amine  | colourless-to-black  | Yellow to quenched         | 1                |
| thiazolothiazole based viologen type molecule | Yellow to blue       | Bright blueish to quenched | 2,3              |
| Fe-MSP with dye                               | Purple to pale red   | Black to red               | 4                |
| Thiophene based polymer                       | Yellow to NIR        | Yellow to transparent      | 5                |
| Arylamine-Fluorene based polymer              | ---                  | Bright to quenched         | 6                |
| Dibenzofulvene derivative small molecules     | Colorless to black   | ----                       | 7                |
| Terpyridine based gel                         | Transparent to black | Bright to quenched         | 8                |
| Thiophene –triazine based COF                 | Yellow to brown      | bluish-green to dark       | <b>This work</b> |

### References:

- (1) T. Yu, Y. Han, H. Yao, Z. Chen and S. Guan, *Dyes Pigm.*, 2020, **181**, 108499-108506.
- (2) T. Adams, A. Brotherton, J. Molai, N. Parmar, J. Palmer, K. Sandor and M. Walter, *Adv. Funct. Mater.*, 2021, **31**, 2103408.
- (3) A. Woodward, J. Kolesar, S. Hall, N. Saleh, D. Jones and M. Walter, *J. Am. Chem. Soc.*, 2017, **139**, 8467-8473.
- (4) T. Suzuki, T. Sato, J. Zhang, M. Kanao, M. Higuchi and H. Maki, *J. Mater. Chem. C*, 2016, **4**, 1594-1598.
- (5) J. Liu, M. Li, J. Wu, Y. Shi, J. Zheng and C. Xu, *Org. Electron.* 2017, **51**, 295-303.

- (6) G. A. Corrente, E. Fabiano, M. L. Deda, F. Manni, G. Gigli, G. Chidichimo, A.-L. Capodilupo and A. Beneduci, *ACS Appl. Mater. Interfaces*, 2019, **11**, 12202-12208.
- (7) G. A. Corrente, E. Fabiano, F. Manni, G. Chidichimo, G. Gigli, A. Beneduci and A.-L. Capodilupo, *Chem. Mater.*, 2018, **30**, 5610-5620.
- (8) S. Halder, S. Roy, M. Dixit and C. Chakraborty, *Chem. Commun.*, 2022, **58**, 8368-8371.
